# Supplementary material
Source: MDPI journal article supplement (https://www.mdpi.com/2073-4441/16/9/1297)
Supplement: s1 [file s1]

## Supplementary Materials

**Table S1:** Location, source, and coordinates of the surface water samples in this study, and the identity of the respective isolates

| Sample | Location                                  | Source     | Coordinates                         | Date       | Isolates recovered                                                       |
|--------|-------------------------------------------|------------|-------------------------------------|------------|--------------------------------------------------------------------------|
| 1      | Fonte (Rendufe, Valpaços)                 | Fountain   | 41°32'5.7408" N<br>7°23'56.4" W     | 14/11/2022 | <i>K. pneumoniae</i> VS3300                                              |
| 2      | Fonte (Rendufe, Valpaços)                 | Fountain   | 41°32'15.774" N<br>7°23'59.1576" W  | 14/11/2022 |                                                                          |
| 3      | Rio Miradeses (Valpaços)                  | River      | 41°34'04.9188" N<br>7°15'35.7084" W | 14/11/2022 | <i>Klebsiella</i> spp. VS3315                                            |
| 4      | Ponte Lages (Valpaços)                    | Stream     | 41°36'18.9324" N<br>7°18'29.0196" W | 14/11/2022 |                                                                          |
| 5      | Rio de Curros (Valpaços)                  | River      | 41°30'20.3364"N<br>7°27'30.0384" W  | 16/11/2022 | <i>K. pneumoniae</i> VS3301                                              |
| 6      | Rio Ribeira Da Fraga (Valpaços)           | River      | 41°32'13.416" N<br>7°26'22.4304" W  | 16/11/2022 | <i>K. pneumoniae</i> VS3302;<br><i>Klebsiella</i> spp. VS3316,<br>VS3317 |
| 7      | Poço (Valpaços)                           | Water Well | 41°36'17.46" N<br>7°19'44.3496" W   | 21/11/2022 | <i>K. pneumoniae</i> VS3303                                              |
| 8      | Fonte (Rendufe, Valpaços)                 | Fountain   | 41°32'5.7408" N<br>7°23'56.4" W     | 21/11/2022 |                                                                          |
| 9      | Ribeira do Cubo (Valpaços)                | Stream     | 41°32'12.084" N<br>7°25'9.8832 W    | 21/11/2022 |                                                                          |
| 10     | Prado (Carrazedo de Montenegro, Valpaços) | Fountain   | 41°33'34.1208" N<br>7°25'52.8672" W | 21/11/2022 |                                                                          |
| 11     | Prado (Carrazedo de Montenegro, Valpaços) | Water Tank | 41°33'34.164" N<br>7°25'52.95" W    | 21/11/2022 |                                                                          |
| 12     | Fonte Chafariz (Valpaços)                 | Fountain   | 41°36'24.5304" N<br>7°18'39.1464" W | 22/11/2022 |                                                                          |

|    |                                                           |            |                                     |            |
|----|-----------------------------------------------------------|------------|-------------------------------------|------------|
| 13 | Rio Tua (Mirandela)                                       | River      | 41°29'11.3892" N<br>7°11'5.07122" W | 28/11/2022 |
| 14 | Rio Tua (Parque de Campismo de<br>Mirandela)              | River      | 41°30'29.8332" N<br>7°11'52.836" W  | 28/11/2022 |
| 15 | Rio Tuela (Vale Juncal, Mirandela)                        | River      | 41°31'59.4372" N<br>7°11'4.884" W   | 28/11/2022 |
| 16 | Rio Tuela (Abambres, Mirandela)                           | River      | 41°33'18.2448" N<br>7°10'45.984" W  | 28/11/2022 |
| 17 | Rio Tuela (Cabanelas, Mirandela)                          | River      | 41°31'26.076" N<br>7°11'28.3524" W  | 28/11/2022 |
| 18 | Poço (Valpaços)                                           | Water Well | 41°35'44.07" N<br>7°18'3.3372" W    | 28/11/2022 |
| 19 | Poço (Vilarandelo, Valpaços)                              | Water Well | 41°39'41.5476" N<br>7°19'44.9292" W | 28/11/2022 |
| 20 | Pereiro (Valpaços)                                        | Water Tank | 41°35'59.8812" N<br>7°24'13.5648" W | 05/12/2022 |
| 21 | Mina (Vilaranda, Valpaços)                                | Water Mine | 41°39'12.3588" N<br>7°25'5.0448" W  | 05/12/2022 |
| 22 | Poço (Argemil, Valpaços)                                  | Water Well | 41°35'0.4668" N<br>7°25'30.0" W     | 05/12/2022 |
| 23 | Fonte (Celeirós, Valpaços)                                | Fountain   | 41°38'56.5008" N<br>7°23'58.542" W  | 05/12/2022 |
| 24 | Nascente (Santiago da Ribeira de<br>Alhariz, Valpaços)    | Spring     | 41°37'5.7792" N<br>7°24'15.2568" W  | 05/12/2022 |
| 25 | Ribeira (Santiago da Ribeira de Alhariz,<br>Valpaços)     | Stream     | 41°37'5.7648" N<br>7°24'15.282" W   | 05/12/2022 |
| 26 | Fonte (Pereiro, Valpaços)                                 | Fountain   | 41°36'1.368" N<br>7°24'14.5188" W   | 05/12/2022 |
| 27 | Ribeira (Nozedo, Valpaços)                                | Stream     | 41°35'9.7908" N<br>7°26'10.0392" W  | 12/12/2022 |
| 28 | Ribeira da Portela (Carrazedo de<br>Montenegro, Valpaços) | Stream     | 41°33'34.1208" N<br>7°25'52.8672" W | 12/12/2022 |

|    |                                          |            |                                     |            |                                                               |
|----|------------------------------------------|------------|-------------------------------------|------------|---------------------------------------------------------------|
| 29 | Ribeira de Sobrado (Sobrado, Valpaços)   | Stream     | 41°34'20.9028" N<br>7°27'45.63" W   | 12/12/2022 |                                                               |
| 30 | Ribeira de Seixedo (Seixedo, Valpaços)   | Stream     | 41°34'30.2592" N<br>7°28'8.346" W   | 12/12/2022 |                                                               |
| 31 | Fonte (Padrela, Valpaços)                | Fountain   | 41°34'8.9652" N<br>7°29'44.7432" W  | 12/12/2022 |                                                               |
| 32 | Ribeira Quinta D. Adelaide (Valpaços)    | Stream     | 41°35'39.9012" N<br>7°18'18.9792" W | 09/01/2023 | <i>K. pneumoniae</i> VS3304                                   |
| 33 | Ribeira Intermarché (Valpaços)           | Stream     | 41°36'24.48" N<br>7°18'21.798" W    | 09/01/2023 | <i>Klebsiella</i> spp. VS3318                                 |
| 34 | Poço (Carrazedo de Montenegro, Valpaços) | Water Well | 41°34'11.2296" N<br>7°25'37.0308" W | 09/01/2023 | <i>Klebsiella</i> spp. VS3319                                 |
| 35 | Ponte da Horta (Crasto, Valpaços)        | Stream     | 41°34'20.1468" N<br>7°19'38.8848" W | 16/01/2023 | <i>K. pneumoniae</i> VS3299                                   |
| 36 | Ribeira (Crasto, Valpaços)               | Stream     | 41°33'42.948" N<br>7°19'36.6348" W  | 16/01/2023 |                                                               |
| 37 | Ribeira Água Revés (Valpaços)            | Stream     | 41°33'43.6752" N<br>7°19'27.9768" W | 16/01/2023 | <i>Klebsiella</i> spp. VS3320                                 |
| 38 | Poço (Água Revés, Valpaços)              | Water Well | 41°33'29.8188" N<br>7°20'49.0272" W | 16/01/2023 |                                                               |
| 39 | Poço (Carrazedo de Montenegro, Valpaços) | Water Well | 41°33'47.3148" N<br>7°25'41.4372" W | 16/01/2023 |                                                               |
| 40 | Rio Rabaçal (Valpaços)                   | River      | 41°37'59.3688" N<br>7°14'49.8372" W | 23/01/2023 | <i>Klebsiella</i> spp. VS3321,<br>VS3322                      |
| 41 | Barragem do Rabaçal (Rebordelo, Vinhais) | Dam        | 41°45'11.43" N<br>7°10'23.4372" W   | 23/01/2023 | <i>K. pneumoniae</i> VS3305                                   |
| 42 | Nascente (Rebordelo, Vinhais)            | Spring     | 41°45'10.2852" N<br>7°10'24.8808" W | 23/01/2023 | <i>Klebsiella</i> spp. VS3323                                 |
| 43 | Fonte (Sonim, Valpaços)                  | Fountain   | 41°44'35.466" N<br>7°11'22.4808" W  | 23/01/2023 | <i>Klebsiella</i> spp. VS3324                                 |
| 44 | Rio Calvo (Santa Valha, Valpaços)        | River      | 41°40'42.582" N<br>7°17'20.1408" W  | 23/01/2023 | <i>K. pneumoniae</i> VS3296;<br><i>Klebsiella</i> spp. VS3325 |

|    |                                                  |          |                                     |            |                                                               |
|----|--------------------------------------------------|----------|-------------------------------------|------------|---------------------------------------------------------------|
| 45 | Fonte (Sá, Valpaços)                             | Fountain | 41°40'28.3728" N<br>7°20'49.5492" W | 30/01/2023 | <i>K. pneumoniae</i> VS3306;<br><i>Klebsiella</i> spp. VS3326 |
| 46 | Rio Torto (Valpaços)                             | River    | 41°33'25.6392" N<br>7°16'59.2068" W | 30/01/2023 | <i>K. pneumoniae</i> VS3307,<br>VS3308, VS3309                |
| 47 | Fonte (Sá, Valpaços)                             | Fountain | 41°40'30.468" N<br>7°20'48.372" W   | 30/01/2023 | <i>K. pneumoniae</i> VS3210                                   |
| 48 | Rio Calvo (Vale de Casas, Valpaços)              | River    | 41°38'34.9692" N<br>7°16'39.4392" W | 01/02/2023 | <i>K. pneumoniae</i> VS3297                                   |
| 49 | Ribeira do Requeiral (Rio de Lobos,<br>Valpaços) | Stream   | 41°36'27.99" N<br>7°19'38.6292" W   | 01/02/2023 | <i>K. pneumoniae</i> VS3298                                   |
| 50 | Ribeira de Vale Machado (Valpaços)               | Stream   | 41°34'0.9912" N<br>7°15'42.8724" W  | 23/02/2023 |                                                               |
| 51 | Ribeira Bufão (Mirandela)                        | Stream   | 41°34'27.8796" N<br>7°18'4.3956" W  | 23/02/2023 | <i>Klebsiella</i> spp. VS3327                                 |
| 52 | Regato Gralheira (Vila Pouca de<br>Aguiar)       | Stream   | 41°26'36.3408" N<br>7°40'25.23" W   | 13/03/2023 |                                                               |
| 53 | Ribeira da Mãe de Água (Vila Pouca de<br>Aguiar) | Stream   | 41°25'13.1628" N<br>7°41'7.5408" W  | 13/03/2023 |                                                               |
| 54 | Fonte (Vila Pouca de Aguilar)                    | Fountain | 41°29'21.7968" N<br>7°38'57.2172" W | 13/03/2023 |                                                               |
| 55 | Regato Carrica (Vila Pouca de Aguilar)           | Stream   | 41°26'0.4092" N<br>7°40'43.9212" W  | 13/03/2023 |                                                               |
| 56 | Ribeiro Telões (Vila Pouca de Aguilar)           | Stream   | 41°28'32.502" N<br>7°39'30.0672" W  | 13/03/2023 |                                                               |
| 57 | Ribeira do Mezio (Vila Pouca de<br>Aguiar)       | Stream   | 41°24'59.562" N<br>7°41'13.668" W   | 15/03/2023 |                                                               |
| 58 | Rio de Soutelo (Vila Real)                       | River    | 41°22'0.516" N<br>7°43'34.824" W    | 15/03/2023 |                                                               |
| 59 | Ribeira da Borralheira (Vila Real)               | Stream   | 41°22'34.608" N<br>7°43'5.376" W    | 15/03/2023 |                                                               |
| 60 | Ribeiro Palheiros (São Lourenço,<br>Chaves)      | Stream   | 41°43'16.9428" N<br>7°25'29.172" W  | 20/03/2023 |                                                               |

|    |                                                        |                  |                                     |            |                               |
|----|--------------------------------------------------------|------------------|-------------------------------------|------------|-------------------------------|
| 61 | Regato de S. Lourenço (Chaves)                         | Stream           | 41°43'14.502" N<br>7°24'33.2748" W  | 20/03/2023 |                               |
| 62 | Regato de Sá (Valpaços)                                | Stream           | 41°40'57.9828" N<br>7°21'35.37" W   | 20/03/2023 |                               |
| 63 | Regadio (Vila Verde da Raia, Chaves)                   | Irrigation Ditch | 41°46'40.6632" N<br>7°25'27.57" W   | 20/03/2023 |                               |
| 64 | Rio Tâmega (Chaves)                                    | River            | 41°44'30.048" N<br>7°27'51.0228" W  | 20/03/2023 | <i>Klebsiella</i> spp. VS3328 |
| 65 | Regato (Sabroso de Aguiar, Vila Pouca de Aguiar)       | Stream           | 41°34'8.022" N<br>7°35'43.3212" W   | 27/03/2023 | <i>K. pneumoniae</i> VS3311   |
| 66 | Rio Tâmega (Outeiro Jusão, Chaves)                     | River            | 41°43'11.8668" N<br>7°28'43.2948" W | 27/03/2023 |                               |
| 67 | Regato (Pedras Salgadas, Vila Pouca de Aguiar)         | Stream           | 41°32'39.6348" N<br>7°36'19.818" W  | 27/03/2023 |                               |
| 68 | Regato Águas Campilho (Vidago, Chaves)                 | Stream           | 41°38'29.5332" N<br>7°34'34.266" W  | 27/03/2023 | <i>K. pneumoniae</i> VS3312   |
| 69 | Rio Avelames (Sabroso de Aguiar, Vila Pouca de Aguiar) | River            | 41°30'40.4748" N<br>7°38'26.6712" W | 27/03/2023 |                               |
| 70 | Ribeira da Maila (Lordelo, Vila Real)                  | Stream           | 41°18'58.644" N<br>7°45'59.13" W    | 04/04/2023 |                               |
| 71 | Regato (Quintelas, Vila Real)                          | Stream           | 41°19'9.7464" N<br>7°47'47.4324" W  | 04/04/2023 |                               |
| 72 | Ribeira de Arnal (Vila Real)                           | Stream           | 41°19'11.7588" N<br>7°47'46.7088" W | 04/04/2023 |                               |
| 73 | Ribeira do Pontão de Outeiro (Vila Real)               | Stream           | 41°19'10.8336" N<br>7°44'38.8896" W | 04/04/2023 |                               |
| 74 | Rio Corgo, parque Corgo (Vila Real)                    | River            | 41°18'19.656" N<br>7°44'7.3608" W   | 04/04/2023 | <i>K. pneumoniae</i> VS3313   |
| 75 | Cascata de Galegos da Serra (Vila Real)                | Stream           | 41°19'32.448" N<br>7°47'57.5448" W  | 04/04/2023 |                               |
| 76 | Ribeira Galegos (Galegos da Serra, Vila Real)          | Stream           | 41°19'47.8992" N<br>7°48'2.4012" W  | 04/04/2023 | <i>K. pneumoniae</i> VS3314   |

|    |                        |       |                                  |            |
|----|------------------------|-------|----------------------------------|------------|
| 77 | Rio Cabril (Vila Real) | River | 41°19'7.23" N<br>7°44'32.7732" W | 04/04/2023 |
|----|------------------------|-------|----------------------------------|------------|

**Table S2:** Primer pairs used for molecular typing, detection of antimicrobial resistance, and virulence genes in *Klebsiella* strains.

| Target gene                     | Primers sequences (5'-3')                          | Amplicon size<br>(base pairs) | Reference |
|---------------------------------|----------------------------------------------------|-------------------------------|-----------|
| <b>Antimicrobial resistance</b> |                                                    |                               |           |
| <i>bla</i> <sub>CTX-U</sub>     | F:CGATGTGCAGTACCAGTAA<br>R:TTAGTGACCAGAATCAGCGG    | 585                           | [1]       |
| <i>bla</i> <sub>CTX-M3</sub>    | F:AATCACTGCGTCAGTTCAC<br>R:TTTATCCCCACAACCCAG      | 701                           | [2]       |
| <i>bla</i> <sub>CTX-M9</sub>    | F:GTGACAAAGAGAGTGCAACGG<br>R:ATGATTCTCGCCGCTGAAGCC | 857                           | [3]       |
| <i>bla</i> <sub>SHV</sub>       | F: CACTCAAGGATGTATTGTG<br>R: TTAGCGTTGCCAGTGCTCG   | 885                           | [4]       |
| <i>bla</i> <sub>TEM</sub>       | F:ATTCTTGAAGACGAAAGGGC<br>R:ACGCTCAGTGGAACGAAAAC   | 1150                          | [4]       |
| <i>ampC</i>                     | F:AATGGGTTTTCTACGGTCTG<br>R:GGGCAGCAAATGTGGAGCAA   | 191                           | [5]       |
| <i>tetA</i>                     | F: GTAATTCTGAGCACTGTCGC<br>R:CTGTCCTGGACAACATTGCTT | 937                           | [4]       |
| <i>tetB</i>                     | F: CTCAGTATTCCAAGCCTTTG<br>R: CTAAGCACTTGTCTCCTGTT | 416                           | [4]       |

|                  |                                                              |     |     |
|------------------|--------------------------------------------------------------|-----|-----|
| <i>aac(3)-II</i> | F: ACTGTGATGGGATACGCGTC<br>R: CTCCGTCAGCGTTTCAGCTA           | 237 | [4] |
| <i>aac(3)-IV</i> | F: CTTCAGGATGGCAAGTTGGT<br>R: TCATCTCGTTCTCCGCTCAT           | 286 | [4] |
| <i>ant(2)</i>    | F:ATGTTACGCAGCAGGGCAGTCG<br>R:CGTCAGATCAATATCATCGTGC         | 188 | [6] |
| <i>strA</i>      | F: ATTCTGACTGGTTGCCTGTC<br>R: CGCAGATAGAAGGCAAGG             | 815 | [4] |
| <i>strB</i>      | F: TTCTCATTGCGGACAACCT<br>R: TAGATCGCGTTGCTCCTCTT            | 747 | [4] |
| <i>aadA1</i>     | F:GCAGCGCAATGACATTCTTG<br>R:ATCCTTCGGCGCGATTTTG              | 282 | [7] |
| <i>aadA5</i>     | F:CTTCAGTTCGGTGAGTGGC<br>R:CAATCGTTGCTTTGGCATAT              | 453 | [8] |
| <i>sul1</i>      | F:TGGTGACGGTGTTCCGGCATTG<br>R: GCGAGGGTTTCCGAGAAGGTG         | 789 | [9] |
| <i>sul2</i>      | F: CGGCATCGTCAACATAACC<br>R: GTGTGCGGATGAAGTCAG              | 722 | [4] |
| <i>sul3</i>      | F:CATTCTAGAAAACAGTCGTAGTTCG<br>R:CATCTGCAGCTAACCTAGGGCTTTGGA | 990 | [4] |



|                             |                                                            |     |      |
|-----------------------------|------------------------------------------------------------|-----|------|
| <i>bla<sub>OXA</sub></i>    | F:ACACAATACATATCAACTTCGC<br>R: AGTGTGTTTAGAATGGTGATC       | 813 | [4]  |
| <i>bla<sub>OXA-48</sub></i> | F:TTGGTGGCATCGATTATCGG<br>R:GAGCACTTCTTTTGTGATGGC          | 743 | [3]  |
| <i>bla<sub>VIM</sub></i>    | F:GATGGTGTGGTTCGCATA<br>R:CGAATGCCGAGCACCAG                | 390 | [3]  |
| <i>bla<sub>IMP</sub></i>    | F:GTTTATGTTCTACTCG<br>R: GGTTAAAAACAACCAC                  | 432 | [10] |
| <i>bla<sub>KPC</sub></i>    | F:GTATCGCCGTCTAGTTCTGC<br>R:GGTCGTGTTCCCTTAGCC             | 638 | [11] |
| <i>parC</i>                 | F:AAACCTGTTCTAGCGCCGCATT<br>R:AAACCTGTTCTAGCGCCGCATT       | 395 | [12] |
| <i>mcr-1</i>                | F:AGTCCGTTTGTCTTGTTGGC<br>R:AGATCCTTGGTCTCGGCTTG           | 320 | [13] |
| <b>Virulence</b>            |                                                            |     |      |
| <i>papC</i>                 | F:GACGGCTGTACTGCAGGGTGTGGCG<br>R:ATATCCTTTCTGCAGGGATGCAATA | 328 | [4]  |
| <i>papG-III</i>             | F: CATTTATCGTCCTCAACTTAG<br>R: AAGAAGGGATTTTGTAGCGTC       | 482 | [4]  |
| <i>cnf1</i>                 | F:AAGATGGAGTTTCTATGCAGGAG<br>R:CATTCTAGAGTCCTGCCCTCATTATT  | 498 | [4]  |

|            |                             |     |      |
|------------|-----------------------------|-----|------|
| <i>aer</i> | F:TACCGGATTGTCATATGCAGACCGT | 602 | [4]  |
|            | R:AATATCTTCCTCCAGTCCGGAGAAG |     |      |
| <i>bfp</i> | F:AACTACATCTAGTACTCAACAACAG | 575 | [14] |
|            | R:ATGTGCTTGAATAACACCATCATCT |     |      |

**Table S3:** Principal Components Analysis. I) Source versus Genotype, Eigenvalues for surface waters PCA; II) Source versus Virulence, Eigenvalues for surface waters PCA.

I)

| Number | Eigenvalue | Percent | Cum Percent |
|--------|------------|---------|-------------|
| 1      | 1,219158   | 10,160  | 10,160      |
| 2      | 1,121243   | 9,344   | 19,503      |
| 3      | 1,085126   | 9,043   | 28,546      |
| 4      | 1,064549   | 8,871   | 37,417      |
| 5      | 1,047725   | 8,731   | 46,148      |
| 6      | 1,031250   | 8,594   | 54,742      |
| 7      | 1,031250   | 8,594   | 63,336      |
| 8      | 1,031250   | 8,594   | 71,930      |
| 9      | 1,031250   | 8,594   | 80,523      |
| 10     | 1,031250   | 8,594   | 89,117      |
| 11     | 1,000000   | 8,333   | 97,450      |
| 12     | 0,305949   | 2,550   | 100,000     |

II)

| Number | Eigenvalue | Percent | Cum Percent |
|--------|------------|---------|-------------|
| 1      | 1,142842   | 19,047  | 19,047      |
| 2      | 1,080484   | 18,008  | 37,055      |
| 3      | 1,047040   | 17,451  | 54,506      |
| 4      | 1,031250   | 17,187  | 71,694      |
| 5      | 1,031250   | 17,187  | 88,881      |
| 6      | 0,667134   | 11,119  | 100,000     |

1. Zong, Z.; Partridge, S.R.; Thomas, L.; Iredell, J.R. Dominance of BlaCTX-M within an Australian Extended-Spectrum  $\beta$ -Lactamase Gene Pool. *Antimicrob Agents Chemother* **2008**, *52*, 4198–4202, doi:10.1128/AAC.00107-08.
2. Maynard, C.; Bekal, S.; Sanschagrin, F.; Levesque, R.C.; Brousseau, R.; Masson, L.; Larivière, S.; Harel, J. Heterogeneity among Virulence and Antimicrobial Resistance Gene Profiles of Extraintestinal Escherichia Coli Isolates of Animal and Human Origin. *J Clin Microbiol* **2004**, *42*, 5444–5452, doi:10.1128/JCM.42.12.5444-5452.2004.
3. Carvalho, I.; Chenouf, N.S.; Cunha, R.; Martins, C.; Pimenta, P.; Pereira, A.R.; Martínez-álvarez, S.; Ramos, S.; Silva, V.; Igrejas, G.; et al. Antimicrobial Resistance Genes and Diversity of Clones among ESBL- and Acquired AmpC-Producing Escherichia Coli Isolated from Fecal Samples of Healthy and Sick Cats in Portugal. *Antibiotics* **2021**, Vol. 10, Page 262 **2021**, *10*, 262, doi:10.3390/ANTIBIOTICS10030262.
4. Garcês, A.; Correia, S.; Amorim, F.; Pereira, J.E.; Igrejas, G.; Poeta, P. First Report on Extended-Spectrum Beta-Lactamase (ESBL) Producing Escherichia Coli from European Free-Tailed Bats (Tadarida Teniotis) in Portugal: A One-Health Approach of a Hidden Contamination Problem. *J Hazard Mater* **2019**, *370*, 219–224, doi:10.1016/J.JHAZMAT.2017.12.053.
5. Caroş —y, N.; Espaze, E.; Be Èrard <sup>TM</sup>, I.; Richet, H.; Reynaud, A. Mutations in the AmpC Promoter of Escherichia Coli Isolates Resistant to Oxyminocephalosporins without Extended Spectrum  $\beta$ -Lactamase Production. *FEMS Microbiol Lett* **1999**, *173*, 459–465, doi:10.1111/J.1574-6968.1999.TB13539.X.
6. Vanhoof, R.; Content, J.; Van Bossuyt, E.; Dewit, L.; Hannecart-pokorni, E. Identification of the AadB Gene Coding for the Aminoglycoside-2"-O-Nucleotidyltraisferase, ANT(2"), by Means of the Polymerase Chain Reaction. *Journal of Antimicrobial Chemotherapy* **1992**, *29*, 365–374, doi:10.1093/JAC/29.4.365.
7. Sáenz, Y.; Briñas, L.; Domínguez, E.; Ruiz, J.; Zarazaga, M.; Vila, J.; Torres, C. Mechanisms of Resistance in Multiple-Antibiotic-Resistant Escherichia Coli Strains of Human, Animal, and Food Origins. *Antimicrob Agents Chemother* **2004**, *48*, 3996–4001, doi:10.1128/AAC.48.10.3996-4001.2004/ASSET/BAF6C9EB-BDBC-44D8-A8B8-E83040DCD8DC/ASSETS/GRAPHIC/ZAC0100443730001.JPEG.
8. Wei, Q.; Jiang, X.; Yang, Z.; Chen, N.; Chen, X.; Li, G.; Lu, Y. DfrA27, a New Integron-Associated Trimethoprim Resistance Gene from Escherichia Coli., doi:10.1093/jac/dkn474.
9. Mazel, D.; Dychinco, B.; Webb, V.A.; Davies, J. Antibiotic Resistance in the ECOR Collection: Integrons and Identification of a Novel Aad Gene. *Antimicrob Agents Chemother* **2000**, *44*, 1568–1574, doi:10.1128/AAC.44.6.1568-1574.2000/ASSET/0ABD19D4-9409-411A-AFC3-B8BEE4FEEC10/ASSETS/GRAPHIC/AC0600809001.JPEG.
10. Aarestrup, F.M.; Agerso, Y.; Gerner-Smidt, P.; Madsen, M.; Jensen, L.B. Comparison of Antimicrobial Resistance Phenotypes and Resistance Genes in Enterococcus Faecalis and Enterococcus Faecium from Humans in the Community, Broilers, and Pigs in Denmark. *Diagn Microbiol Infect Dis* **2000**, *37*, 127–137, doi:10.1016/S0732-8893(00)00130-9.
11. Neyestanaki, D.K.; Mirsalehian, A.; Rezagholizadeh, F.; Jabalameli, F.; Taherikalani, M.; Emaneini, M. Determination of Extended Spectrum Beta-Lactamases, Metallo-Beta-Lactamases and AmpC-Beta-Lactamases among Carbapenem Resistant Pseudomonas Aeruginosa Isolated from Burn Patients. *Burns* **2014**, *40*, 1556–1561, doi:10.1016/J.BURNS.2014.02.010.
12. Vila, J.; Ruiz, J.; Goñi, P.; Jimenez De Anta, M.T. Detection of Mutations in ParC in Quinolone-Resistant Clinical Isolates of Escherichia Coli. *Antimicrob Agents Chemother* **1996**, *40*, 491–493, doi:10.1128/AAC.40.2.491.

13. Rita Rebelo, A.; Bortolaia, V.; Kjeldgaard, J.S.; Pedersen, S.K.; Leekitcharoenphon, P.; Hansen, I.M.; Guerra, B.; Malorny, B.; Borowiak, M.; Andre Hammerl, J.; et al. Multiplex PCR for Detection of Plasmid-Mediated Colistin Resistance Determinants, Mcr-1, Mcr-2, Mcr-3, Mcr-4 and Mcr-5 for Surveillance Purposes. 1, doi:10.2807/1560-7917.ES.2018.23.6.17-00672.
14. Bardiau, M.; Labruzzo, S.; Mainil, J.G. Study of Polymorphisms in Tir, Eae and TccP2 Genes in Enterohaemorrhagic and Enteropathogenic Escherichia Coli of Serogroup O26. *BMC Microbiol* **2011**, *11*, 1–7, doi:10.1186/1471-2180-11-124/TABLES/4.
